# Supplementary material for: A simple route to prepare a Cu2O–CuO–GN nanohybrid for high-performance electrode materials
Source: Royal Society of Chemistry journal article supplement (doi:10.1039/c6ra26535a), 2017-01-01
Supplement: c6ra26535a1.pdf [file c6ra26535a1.pdf]

**Supporting Information**  
**A Simple Route to Prepare Cu<sub>2</sub>O-CuO-GN Nanohybrid for High-performance Electrode Materials**

Yanyun Liu\*<sup>a</sup>, Ling Ma<sup>a</sup>, Dong Zhang<sup>b</sup>, Gaoyi Han<sup>c,d</sup>, Yunzhen Chang<sup>c,d</sup>

<sup>a</sup>College of Chemistry and Chemical Engineering, Jinzhong University, Jinzhong 030619, PR China

E-mail:312217642@qq.com

<sup>b</sup>School of Material Science and Engineering, Tongji University, Shanghai 200092, PR China

<sup>c</sup>Institute of Molecular Science, Innovation Center of Chemistry and Molecular Science, Shanxi University, Taiyuan 030006, PR China

<sup>d</sup>Key Laboratory of Materials for Energy Conversion and Storage of Shanxi Province, Taiyuan 030006, PR China

1

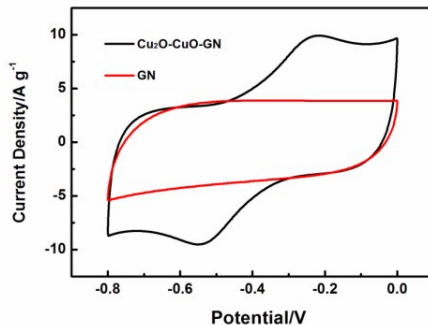

SFig.1 CV curves of GN and Cu<sub>2</sub>O-CuO-GN at scan rate of 10 mV s<sup>-1</sup> in 3-electrode system

2

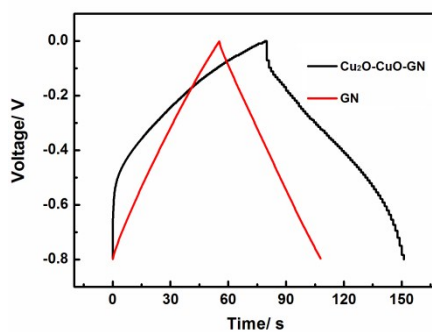

SFig.2 DC curves of GN and Cu<sub>2</sub>O-CuO-GN at current density of 2.0 A g<sup>-1</sup> in 3-electrode system
